# Supplementary material for: Bacterial pneumonia and its associated factors in children from a developing country: A prospective cohort study
Source: PubMed Central journal article supplement (PMC7021284; doi:10.1371/journal.pone.0228056), 2020-02-14
Supplement: pone.0228056.s001.pdf [file pone.0228056.s001.pdf]

**S1 Table : Summary of the bacteria detected via PCR in induced sputum of children admitted for very severe pneumonia.**

| Bacteria Detected <sup>a</sup>  | N = 139 | %    |
|---------------------------------|---------|------|
|                                 | N       |      |
| <i>H. influenzae</i>            | 57      | 41   |
| <i>S. pneumoniae</i>            | 37      | 26.6 |
| <i>S. aureus</i>                | 56      | 40.3 |
| <i>M. catarrhalis</i>           | 4       | 2.9  |
| <i>B. pertussis</i>             | 2       | 1.4  |
| <i>M. pneumoniae</i>            | 1       | 0,7  |
| <i>Chlamydophila pneumoniae</i> | 0       | 0    |

<sup>a</sup> In 19 patients more than 1 bacteria were detected via PCR in the induced sputum
